# Supplementary material for: Genetic basis of cardiomyopathy and the genotypes involved in prognosis and left ventricular reverse remodeling
Source: PubMed Central journal article supplement (PMC5792481; doi:10.1038/s41598-018-20114-9), 2018-01-31
Supplement: 41598_2018_20114_MOESM1_ESM.pdf [file 41598_2018_20114_MOESM1_ESM.pdf]

## Supplementary Materials

### **Genetic basis of cardiomyopathy and the genotypes involved in prognosis and left ventricular reverse remodeling**

Takashige Tobita<sup>1,2\*</sup>, Seitaro Nomura<sup>3,4\*</sup>, Takanori Fujita<sup>3</sup>, Hiroyuki Morita<sup>4</sup>, Yoshihiro Asano<sup>5</sup>, Kenji Onoue<sup>6</sup>, Masamichi Ito<sup>4</sup>, Yasushi Imai<sup>7</sup>, Atsushi Suzuki<sup>1</sup>, Toshiyuki Ko<sup>4</sup>, Masahiro Satoh<sup>8</sup>, Kanna Fujita<sup>4</sup>, Atsuhiko T Naito<sup>4</sup>, Yoshiyuki Furutani<sup>9</sup>, Haruhiro Toko<sup>4</sup>, Mutsuo Harada<sup>4</sup>, Eisuke Amiya<sup>4</sup>, Masaru Hatano<sup>4</sup>, Eiki Takimoto<sup>4</sup>, Tsuyoshi Shiga<sup>1</sup>, Toshio Nakanishi<sup>9</sup>, Yasushi Sakata<sup>5</sup>, Minoru Ono<sup>10</sup>, Yoshihiko Saito<sup>6</sup>, Seiji Takashima<sup>11</sup>, Nobuhisa Hagiwara<sup>1</sup>, Hiroyuki Aburatani<sup>3</sup>, and Issei Komuro<sup>4</sup>

<sup>1</sup>Department of Cardiology, Tokyo Women's Medical University

<sup>2</sup>Research Fellow of Japan Society for the Promotion of Science

<sup>3</sup>Genome Science Division, Research Center for Advanced Science and Technology, The University of Tokyo

<sup>4</sup>Department of Cardiovascular Medicine, Graduate School of Medicine, The University of Tokyo

<sup>5</sup>Department of Cardiovascular Medicine, Osaka University Graduate School of Medicine

<sup>6</sup>First Department of Internal Medicine, Nara Medical University

<sup>7</sup>Division of Cardiovascular Medicine, Jichi Medical University

<sup>8</sup>Department of Cardiovascular Medicine, Chiba University Graduate School of Medicine

<sup>9</sup>Department of Pediatric Cardiology, Tokyo Women's Medical University

<sup>10</sup>Department of Cardiovascular Surgery, Graduate School of Medicine, The University of Tokyo

<sup>11</sup>Department of Medical Biochemistry, Osaka University Graduate School of Medicine

\* These authors contributed equally to this work.

Correspondence: Hiroyuki Aburatani and Issei Komuro

Addresses for correspondence:

Full name: Hiroyuki Aburatani

Postal address: 4-6-1 Komaba, Meguro-ku, Tokyo 153-8904, Japan

Telephone: +81-3-5452-5352

Fax number: +81-3-5452-5355

E-mail: haburata-ky@umin.ac.jp

Full name: Issei Komuro

Postal address: 7-3-1 Hongo, Bunkyo-ku, Tokyo 113-8655, Japan

Telephone: +81-3-5800-6526

Fax number: +81-3-3815-2087

E-mail: komuro-ky@umin.ac.jp

Supplementary Table 1. Genes analyzed in this study.

|                                      | <b>Gene symbol</b> |               |                |                |
|--------------------------------------|--------------------|---------------|----------------|----------------|
| <b>Cardiomyopathy related genes</b>  | <i>ABCC9</i>       | <i>ACTC1</i>  | <i>ACTN2</i>   | <i>ANKRD1</i>  |
|                                      | <i>BAG3</i>        | <i>CALR3</i>  | <i>CAV3</i>    | <i>CRYAB</i>   |
|                                      | <i>CSRP3</i>       | <i>DES</i>    | <i>DMD</i>     | <i>DSC2</i>    |
|                                      | <i>DSG2</i>        | <i>DSP</i>    | <i>EMD</i>     | <i>EYA4</i>    |
|                                      | <i>FXN</i>         | <i>GLA</i>    | <i>ILK</i>     | <i>JPH2</i>    |
|                                      | <i>JUP</i>         | <i>LAMP2</i>  | <i>LDB3</i>    | <i>LMNA</i>    |
|                                      | <i>MYBPC3</i>      | <i>MYH6</i>   | <i>MYH7</i>    | <i>MYL2</i>    |
|                                      | <i>MYL3</i>        | <i>MYOM1</i>  | <i>MYOZ2</i>   | <i>MYPN</i>    |
|                                      | <i>NEBL</i>        | <i>NEXN</i>   | <i>PDLIM3</i>  | <i>PKP2</i>    |
|                                      | <i>PLN</i>         | <i>PRKAG2</i> | <i>PTPN11</i>  | <i>RAF1</i>    |
|                                      | <i>RBM20</i>       | <i>RYR2</i>   | <i>SCN5A</i>   | <i>SGCD</i>    |
|                                      | <i>TAZ</i>         | <i>TCAP</i>   | <i>TGFB3</i>   | <i>TMEM43</i>  |
|                                      | <i>TMPO</i>        | <i>TNNC1</i>  | <i>TNNI3</i>   | <i>TNNT2</i>   |
|                                      | <i>TPM1</i>        | <i>TTN</i>    | <i>TTR</i>     | <i>TXNRD2</i>  |
|                                      | <i>VCL</i>         |               |                |                |
| <b>Arrhythmia related genes</b>      | <i>AKAP9</i>       | <i>ANK2</i>   | <i>CACNA1C</i> | <i>CACNB2</i>  |
|                                      | <i>CASQ2</i>       | <i>GPD1L</i>  | <i>KCNE1</i>   | <i>KCNE2</i>   |
|                                      | <i>KCNE3</i>       | <i>KCNH2</i>  | <i>KCNJ2</i>   | <i>KCNQ1</i>   |
|                                      | <i>SCN1B</i>       | <i>SCN3B</i>  | <i>SCN4B</i>   | <i>SNTA1</i>   |
| <b>Noonan syndrome related genes</b> | <i>BRAF</i>        | <i>CBL</i>    | <i>HRAS</i>    | <i>KRAS</i>    |
|                                      | <i>MAP2K1</i>      | <i>MAP2K2</i> | <i>NF1</i>     | <i>NRAS</i>    |
|                                      | <i>RIT1</i>        | <i>SHOC2</i>  | <i>SOS1</i>    | <i>SPREED1</i> |
| <b>Marfan syndrome related genes</b> | <i>ACTA2</i>       | <i>CBS</i>    | <i>COL3A1</i>  | <i>FBN1</i>    |
|                                      | <i>FBN2</i>        | <i>MYH11</i>  | <i>SLC2A10</i> | <i>SMAD3</i>   |
|                                      | <i>TGFBR1</i>      | <i>TGFBR2</i> |                |                |

Gene symbols analyzed in our study are shown.

Supplementary Table 2. List of genetic variants identified in DCM patients.

| Gene   | Chromosome | Genomic Location | Nucleotide Change   | Amino Acid Change | RefSeq    | Count | Variant type | HGMD | Variant class | CADD score |
|--------|------------|------------------|---------------------|-------------------|-----------|-------|--------------|------|---------------|------------|
| ACTN2  | 1          | 236902621        | c.866G>A            | p.R299H           | NM_001103 | 1     | missense     | NA   | VUS           | 34         |
| AKAP9  | 7          | 91631254         | c.2023A>G           | p.S675G           | NM_05751  | 1     | missense     | NA   | VUS           | 22.9       |
| ANK2   | 4          | 114264189        | c.4139C>T           | p.P1380L          | NM_001148 | 1     | missense     | NA   | VUS           | 34         |
| BAG3   | 10         | 121429549        | c.367C>T            | p.R123*           | NM_004281 | 1     | nonsense     | DM   | PM            | 37         |
| BAG3   | 10         | 121429668        | c.486_487insCCAGCCT | p.P163fs          | NM_004281 | 1     | frameshift   | NA   | PM            | 33         |
| CACNB2 | 10         | 18828645         | c.1813C>T           | p.R605C           | NM_201590 | 1     | missense     | NA   | VUS           | 31         |
| CBS    | 21         | 44480624         | c.1072G>T           | p.V358L           | NM_000071 | 1     | missense     | NA   | VUS           | 14.83      |
| DES    | 2          | 220283563        | c.379C>A            | p.I27S            | NM_001927 | 1     | missense     | NA   | VUS           | 34         |
| DES    | 2          | 220286086        | c.1048C>T           | p.R350W           | NM_001927 | 2     | missense     | DM   | PM            | 34         |
| DES    | 2          | 220286282        | c.1244G>A           | p.R415Q           | NM_001927 | 1     | missense     | NA   | VUS           | 34         |
| DMD    | X          | 32305755         | c.6181G>A           | p.A2061T          | NM_004006 | 1     | missense     | NA   | VUS           | 12.8       |
| DMD    | X          | 32841504         | c.265G>A            | p.V89I            | NM_004006 | 1     | missense     | NA   | VUS           | 24.2       |
| DSP    | 6          | 7562969          | c.682A>G            | p.I228V           | NM_004415 | 1     | missense     | NA   | VUS           | 23.1       |
| DSP    | 6          | 7567585          | c.1045-2A>G         | p.A349_splice     | NM_004415 | 1     | splice site  | NA   | PM            | 25.1       |
| DSP    | 6          | 7579748          | c.3326_3328delAGA   | p.1110del         | NM_004415 | 1     | inframe-del  | NA   | VUS           | 15.05      |
| DSP    | 6          | 7582915          | c.5420A>G           | p.Q1807R          | NM_004415 | 1     | missense     | NA   | VUS           | 17.08      |
| EMD    | X          | 153607864        | c.20T>C             | p.L7P             | NM_000117 | 1     | missense     | NA   | VUS           | 22.8       |
| FBN1   | 15         | 48755410         | c.5093A>G           | p.N1698S          | NM_000138 | 1     | missense     | NA   | VUS           | 14.18      |
| FBN2   | 5          | 127648409        | c.4796T>C           | p.V1599A          | NM_001999 | 1     | missense     | NA   | VUS           | 25.6       |
| FBN2   | 5          | 127671695        | c.3709C>T           | p.R1237C          | NM_001999 | 1     | missense     | NA   | VUS           | 26.6       |
| FBN2   | 5          | 127681166        | c.3100G>A           | p.G1034S          | NM_001999 | 1     | missense     | NA   | VUS           | 34         |
| JPH2   | 20         | 42815248         | c.98A>C             | p.K33T            | NM_020433 | 1     | missense     | NA   | VUS           | 26.2       |
| JUP    | 17         | 39919472         | c.1260C>G           | p.C420W           | NM_002230 | 1     | missense     | NA   | VUS           | 24.4       |
| KCNQ1  | 11         | 2797263          | c.1664G>A           | p.R555H           | NM_000218 | 1     | missense     | DM   | VUS           | 34         |
| LMNA   | 1          | 156084954        | c.242A>T            | p.E81V            | NM_170707 | 1     | missense     | NA   | VUS           | 29.5       |
| LMNA   | 1          | 156085053        | c.343_344delGAinsAT | p.E115M           | NM_170707 | 3     | missense     | NA   | VUS           | 31         |
| LMNA   | 1          | 156104248        | c.568C>T            | p.R190W           | NM_170707 | 2     | missense     | DM   | PM            | 35         |
| LMNA   | 1          | 156104312        | c.632A>G            | p.Y211C           | NM_170707 | 1     | missense     | NA   | VUS           | 20.4       |
| LMNA   | 1          | 156104629        | c.673C>T            | p.R225*           | NM_170707 | 1     | nonsense     | DM   | PM            | 38         |
| LMNA   | 1          | 156104666        | c.711_712delTG      | p.F237fs          | NM_170707 | 1     | frameshift   | NA   | PM            | 35         |
| LMNA   | 1          | 156105070        | c.904_905delCT      | p.L302fs          | NM_170707 | 1     | frameshift   | NA   | PM            | 34         |
| LMNA   | 1          | 156105813        | c.1058A>G           | p.Q353R           | NM_170707 | 1     | missense     | DM   | PM            | 25.9       |
| LMNA   | 1          | 156106119        | c.1273_1274delGA    | p.E425fs          | NM_170707 | 1     | frameshift   | NA   | PM            | 35         |
| LMNA   | 1          | 156106166        | c.1320delG          | p.V440fs          | NM_170707 | 1     | frameshift   | NA   | PM            | 35         |
| MAP2K2 | 19         | 4090636          | c.1163G>A           | p.R388Q           | NM_030662 | 1     | missense     | NA   | VUS           | 23.3       |
| MYBPC3 | 11         | 47362581         | c.1900G>T           | p.V634F           | NM_000256 | 1     | missense     | NA   | VUS           | 33         |
| MYH11  | 16         | 15812297         | c.5172-2A>G         | p.R1724_splice    | NM_002474 | 1     | splice site  | NA   | VUS           | 23.2       |
| MYH11  | 16         | 15835450         | c.2729G>A           | p.R910Q           | NM_002474 | 1     | missense     | NA   | VUS           | 34         |
| MYH6   | 14         | 23856862         | c.4526A>T           | p.E1509V          | NM_002471 | 1     | missense     | NA   | VUS           | 31         |
| MYOM1  | 18         | 3100422          | c.3578C>A           | p.T1193K          | NM_003803 | 1     | missense     | NA   | VUS           | 32         |
| MYOM1  | 18         | 3215053          | c.169G>A            | p.E57K            | NM_003803 | 1     | missense     | NA   | VUS           | 21.4       |

|       |    |           |                                     |             |              |   |            |     |     |       |
|-------|----|-----------|-------------------------------------|-------------|--------------|---|------------|-----|-----|-------|
| MYOZ2 | 4  | 120079222 | c.292G>A                            | p.E98K      | NM_016599    | 1 | missense   | NA  | VUS | 20.5  |
| MYPN  | 10 | 69918324  | c.1399G>A                           | p.E467K     | NM_032578    | 1 | missense   | NA  | VUS | 20.8  |
| NEBL  | 10 | 21104612  | c.2183C>A                           | p.T728N     | NM_006393    | 1 | missense   | NA  | VUS | 19.23 |
| NEXN  | 1  | 78401616  | c.1360A>G                           | p.K454E     | NM_144573    | 1 | missense   | NA  | VUS | 21.8  |
| NF1   | 17 | 29676156  | c.7145C>A                           | p.P2382H    | NM_000267    | 1 | missense   | NA  | VUS | 32    |
| NF1   | 17 | 29701168  | c.8452G>A                           | p.V2818M    | NM_000267    | 1 | missense   | DM? | VUS | 25.6  |
| PKP2  | 12 | 33030874  | c.940G>A                            | p.G314R     | NM_004572    | 1 | missense   | NA  | VUS | 23.8  |
| RBM20 | 10 | 112559581 | c.1705G>A                           | p.A569T     | NM_001134363 | 1 | missense   | NA  | VUS | 28.6  |
| RBM20 | 10 | 112572055 | c.1900C>T                           | p.R634W     | NM_001134363 | 2 | missense   | DM  | PM  | 25.4  |
| RBM20 | 10 | 112572062 | c.1907G>A                           | p.R636H     | NM_001134363 | 1 | missense   | DM  | PM  | 28.3  |
| RBM20 | 10 | 112590905 | c.3538C>A                           | p.H1180N    | NM_001134363 | 1 | missense   | NA  | VUS | 29.4  |
| RYR2  | 1  | 237798272 | c.6672C>T                           | p.R2258C    | NM_001035    | 1 | missense   | NA  | VUS | 35    |
| RYR2  | 1  | 237875094 | c.10280A>G                          | p.N3427S    | NM_001035    | 1 | missense   | NA  | VUS | 24.2  |
| RYR2  | 1  | 237949300 | c.13292A>C                          | p.E4431A    | NM_001035    | 1 | missense   | NA  | VUS | 11.72 |
| RYR2  | 1  | 237961422 | c.14042A>G                          | p.D4681G    | NM_001035    | 1 | missense   | NA  | VUS | 25.8  |
| SCN5A | 3  | 38627529  | c.2440C>T                           | p.R814W     | NM_198056    | 1 | missense   | DM  | PM  | 34    |
| SCN5A | 3  | 38651326  | c.833A>G                            | p.H278R     | NM_198056    | 1 | missense   | NA  | VUS | 23.4  |
| SCN5A | 3  | 38662334  | c.611C>A                            | p.A204E     | NM_198056    | 1 | missense   | NA  | VUS | 33    |
| SMAD3 | 15 | 67457668  | c.478A>G                            | p.I160V     | NM_005902    | 1 | missense   | NA  | VUS | 16.34 |
| SOS1  | 2  | 39213197  | c.3770C>T                           | p.T1257I    | NM_005633    | 1 | missense   | NA  | VUS | 14.78 |
| TNNC1 | 3  | 52485853  | c.224A>G                            | p.D75G      | NM_003280    | 1 | missense   | NA  | VUS | 25    |
| TNNT2 | 1  | 201332507 | c.487G>A                            | p.E163K     | NM_001001430 | 1 | missense   | DM  | PM  | 34    |
| TNNT2 | 1  | 201333481 | c.404C>T                            | p.A135V     | NM_001001430 | 1 | missense   | NA  | VUS | 23.8  |
| TTN   | 2  | 179397217 | c.104125C>T                         | p.R34709C   | NM_001267550 | 1 | missense   | NA  | VUS | 24.6  |
| TTN   | 2  | 179397979 | c.103363C>T                         | p.R34455C   | NM_001267550 | 1 | missense   | NA  | VUS | 24.0  |
| TTN   | 2  | 179398606 | c.102736C>T                         | p.R34246C   | NM_001267550 | 1 | missense   | NA  | VUS | 23.2  |
| TTN   | 2  | 179398978 | c.102364G>T                         | p.G34122*   | NM_001267550 | 1 | nonsense   | NA  | PM  | 73    |
| TTN   | 2  | 179398981 | c.102361A>G                         | p.K34121E   | NM_001267550 | 1 | missense   | NA  | VUS | 16.35 |
| TTN   | 2  | 179399281 | c.102061C>G                         | p.Q34021E   | NM_001267550 | 1 | missense   | NA  | VUS | 13.42 |
| TTN   | 2  | 179399484 | c.101858C>G                         | p.S33953C   | NM_001267550 | 1 | missense   | NA  | VUS | 16.29 |
| TTN   | 2  | 179404141 | c.98651C>G                          | p.S32884C   | NM_001267550 | 1 | missense   | NA  | VUS | 19.33 |
| TTN   | 2  | 179404142 | c.98650_98651insT                   | p.S32884fs  | NM_001267550 | 1 | frameshift | NA  | PM  | 63    |
| TTN   | 2  | 179404516 | c.98275delG                         | p.E32759fs  | NM_001267550 | 1 | frameshift | NA  | PM  | 63    |
| TTN   | 2  | 179406264 | c.97540G>C                          | p.D32514H   | NM_001267550 | 1 | missense   | NA  | VUS | 23.4  |
| TTN   | 2  | 179408359 | c.96341T>C                          | p.V32114A   | NM_001267550 | 1 | missense   | NA  | VUS | 20.6  |
| TTN   | 2  | 179408584 | c.96287C>G                          | p.A32096G   | NM_001267550 | 1 | missense   | NA  | VUS | 21.1  |
| TTN   | 2  | 179408605 | c.96266_95267insA                   | p.N32089fs  | NM_001267550 | 1 | frameshift | NA  | PM  | 63    |
| TTN   | 2  | 179412812 | c.93541G>A                          | p.E31181K   | NM_001267550 | 1 | missense   | NA  | VUS | 23.1  |
| TTN   | 2  | 179419300 | c.88774A>G                          | p.I29592V   | NM_001267550 | 1 | missense   | NA  | VUS | 15.69 |
| TTN   | 2  | 179424065 | c.86775_86793delTGGTGTTGGTATACCAGCT | p.F28925fs  | NM_001267550 | 1 | frameshift | NA  | PM  | 62    |
| TTN   | 2  | 179424113 | c.86742_86745delCTAT                | p.J128914fs | NM_001267550 | 1 | frameshift | NA  | PM  | 62    |
| TTN   | 2  | 179424732 | c.86113_86126delAATGCTCCCTGTCT      | p.L28705fs  | NM_001267550 | 1 | frameshift | NA  | PM  | 63    |
| TTN   | 2  | 179426204 | c.84655C>T                          | p.L28219F   | NM_001267550 | 1 | missense   | NA  | VUS | 17.84 |
| TTN   | 2  | 179431246 | c.79613C>T                          | p.T26538I   | NM_001267550 | 1 | missense   | NA  | VUS | 19.29 |
| TTN   | 2  | 179432118 | c.78741C>A                          | p.F26247L   | NM_001267550 | 1 | missense   | NA  | VUS | 17.22 |

|     |   |           |                                 |                  |              |   |             |    |     |       |
|-----|---|-----------|---------------------------------|------------------|--------------|---|-------------|----|-----|-------|
| TTN | 2 | 179435968 | c.74891C>T                      | p.P24964L        | NM_001267550 | 1 | missense    | NA | VUS | 19.56 |
| TTN | 2 | 179437461 | c.73397delA                     | p.H24466fs       | NM_001267550 | 1 | frameshift  | NA | PM  | 61    |
| TTN | 2 | 179438625 | c.72233delT                     | p.I24078fs       | NM_001267550 | 1 | frameshift  | NA | PM  | 61    |
| TTN | 2 | 179439674 | c.71184_71185insG               | p.P23729fs       | NM_001267550 | 1 | frameshift  | NA | PM  | 61    |
| TTN | 2 | 179440628 | c.70231G>A                      | p.G23411S        | NM_001267550 | 1 | missense    | NA | VUS | 22.6  |
| TTN | 2 | 179446774 | c.66322A>T                      | p.K22108*        | NM_001267550 | 1 | nonsense    | NA | PM  | 63    |
| TTN | 2 | 179449396 | c.64972G>C                      | p.G21658R        | NM_001267550 | 1 | missense    | NA | VUS | 18.69 |
| TTN | 2 | 179453500 | c.62952G>A                      | p.W20984*        | NM_001267550 | 1 | nonsense    | NA | PM  | 63    |
| TTN | 2 | 179453592 | c.62860C>A                      | p.P20954T        | NM_001267550 | 1 | missense    | NA | VUS | 17.12 |
| TTN | 2 | 179455175 | c.61276delC                     | p.L20426fs       | NM_001267550 | 1 | frameshift  | NA | PM  | 56    |
| TTN | 2 | 179456409 | c.60137A>G                      | p.Y20046C        | NM_001267550 | 1 | missense    | NA | VUS | 21.1  |
| TTN | 2 | 179458541 | c.58471_58485delGAGGTGACCAAAGAT | p.19491_19495del | NM_001267550 | 1 | inframe-del | NA | VUS | 23    |
| TTN | 2 | 179460434 | c.57646delA                     | p.I19246fs       | NM_001267550 | 1 | frameshift  | NA | PM  | 55    |
| TTN | 2 | 179477147 | c.50104_50105insG               | p.D16702fs       | NM_001267550 | 1 | frameshift  | NA | PM  | 53    |
| TTN | 2 | 179481515 | c.48099_48100delTA              | p.Y16033fs       | NM_001267550 | 1 | frameshift  | NA | PM  | 48    |
| TTN | 2 | 179482614 | c.47467G>T                      | p.D15823Y        | NM_001267550 | 1 | missense    | NA | VUS | 21.1  |
| TTN | 2 | 179484532 | c.46507_46508delAA              | p.I5503fs        | NM_001267550 | 1 | frameshift  | NA | PM  | 48    |
| TTN | 2 | 179500302 | c.41748delA                     | p.E13916fs       | NM_001267550 | 1 | frameshift  | NA | PM  | 38    |
| TTN | 2 | 179509319 | c.40433A>G                      | p.E13478G        | NM_001267550 | 1 | missense    | NA | VUS | 22.2  |
| TTN | 2 | 179517966 | c.38790A>T                      | p.K12930N        | NM_001267550 | 1 | missense    | NA | VUS | 22.2  |
| TTN | 2 | 179545860 | c.33286C>T                      | p.R11096C        | NM_001267550 | 1 | missense    | NA | VUS | 23.1  |
| TTN | 2 | 179567186 | c.30428A>C                      | p.D10143A        | NM_001267550 | 1 | missense    | NA | VUS | 23    |
| TTN | 2 | 179567366 | c.30248G>A                      | p.R10083H        | NM_001267550 | 1 | missense    | NA | VUS | 23.8  |
| TTN | 2 | 179588603 | c.21383G>A                      | p.R7128H         | NM_001267550 | 1 | missense    | NA | VUS | 22.5  |
| TTN | 2 | 179605842 | c.12117delC                     | p.P4039fs        | NM_001267550 | 1 | frameshift  | NA | PM  | 21.3  |
| TTN | 2 | 179606414 | c.11546C>G                      | p.P3849R         | NM_001267550 | 1 | missense    | NA | VUS | 17.65 |
| TTN | 2 | 179621086 | c.11117T>C                      | p.L3706P         | NM_001267550 | 1 | missense    | NA | VUS | 13.56 |
| TTN | 2 | 179621336 | c.10867A>C                      | p.T3623P         | NM_001267550 | 1 | missense    | NA | VUS | 13.99 |
| TTN | 2 | 179634405 | c.15103+1G>A                    | p.P2968_splice   | NM_001267550 | 1 | splice site | NA | PM  | 26.5  |
| TTN | 2 | 179642221 | c.4571A>G                       | p.D1524G         | NM_001267550 | 1 | missense    | NA | VUS | 22.5  |
| TTN | 2 | 179650691 | c.2254C>T                       | p.R752C          | NM_001267550 | 1 | missense    | NA | VUS | 23.3  |
| TTN | 2 | 179659218 | c.1306G>A                       | p.A436T          | NM_001267550 | 1 | missense    | NA | VUS | 23.3  |

The gene symbol, chromosome, position, nucleotide change, amino acid change, RefSeq number of each variant, count, variant type, evaluation of HGMD, variant class, and CADD score are shown. DCM, dilated cardiomyopathy; DM, disease-causing mutation; HGMD, Human Genome Mutation Database; NA, not applicable; PM, pathogenic mutation; VUS, variant of uncertain significance.

Supplementary Table 3. List of genetic variants identified in HCM patients.

| Gene    | Chromosome | Genomic Location | Nucleotide Change                | Amino Acid Change | RefSeq       | Count | Variant type | HGMD | Variant class | CADD score |
|---------|------------|------------------|----------------------------------|-------------------|--------------|-------|--------------|------|---------------|------------|
| ACTN2   | 1          | 236917368        | c.1961A>C                        | p.Q654P           | NM_001103    | 1     | missense     | NA   | VUS           | 28.1       |
| CACNA1C | 12         | 2705119          | c.2743A>G                        | p.I915V           | NM_000719    | 1     | missense     | NA   | VUS           | 13.49      |
| DMD     | X          | 32404439         | c.4662G>T                        | p.E1554D          | NM_004006    | 1     | missense     | NA   | VUS           | 22.9       |
| DSP     | 6          | 7575601          | c.2510A>C                        | p.Q837P           | NM_004415    | 1     | missense     | NA   | VUS           | 27.3       |
| DSP     | 6          | 7578697          | c.2986G>C                        | p.A996P           | NM_004415    | 1     | missense     | NA   | VUS           | 25.4       |
| FBN2    | 5          | 127614470        | c.7202G>A                        | p.S2401N          | NM_001999    | 2     | missense     | NA   | VUS           | 15.56      |
| KCNQ1   | 11         | 2594110          | c.544G>T                         | p.G272V           | NM_000218    | 1     | missense     | DM   | VUS           | 24.2       |
| LMNA    | 1          | 156104248        | c.568C>T                         | p.R190W           | NM_170707    | 1     | missense     | DM   | PM            | 35         |
| LMNA    | 1          | 156107526        | c.1690C>T                        | p.H564Y           | NM_170707    | 1     | missense     | NA   | VUS           | 22.5       |
| MYBPC3  | 11         | 47355283         | c.2996_3013delGCAAGCCCCGGCCTCAGG | p.999_1004del     | NM_000256    | 1     | inframe-del  | NA   | VUS           | 36         |
| MYBPC3  | 11         | 47356592         | c.2905+1G>A                      | p.Q969_splice     | NM_000256    | 1     | splice site  | DM   | PM            | 27.6       |
| MYBPC3  | 11         | 47356663         | c.2833_2834delCG                 | p.R945fs          | NM_000256    | 1     | frameshift   | DM   | PM            | 35         |
| MYBPC3  | 11         | 47359276         | c.2377_2378insG                  | p.E793fs          | NM_000256    | 1     | frameshift   | NA   | PM            | 35         |
| MYBPC3  | 11         | 47361201         | c.2067+1G>A                      | p.Q689_splice     | NM_000256    | 2     | splice site  | DM   | PM            | 25.2       |
| MYBPC3  | 11         | 47363554         | c.1780delT                       | p.S593fs          | NM_000256    | 3     | frameshift   | DM   | PM            | 35         |
| MYBPC3  | 11         | 47364155         | c.1597delC                       | p.Q533fs          | NM_000256    | 1     | frameshift   | NA   | PM            | 33         |
| MYBPC3  | 11         | 47372845         | c.237C>G                         | p.Y79*            | NM_000256    | 1     | nonsense     | DM   | PM            | 24.5       |
| MYH11   | 16         | 15931951         | c.159G>C                         | p.E53D            | NM_002474    | 1     | missense     | NA   | VUS           | 24.9       |
| MYH7    | 14         | 23893235         | c.2803G>A                        | p.E935K           | NM_000257    | 1     | missense     | DM   | PM            | 33         |
| MYH7    | 14         | 23894111         | c.2546T>C                        | p.M849T           | NM_000257    | 1     | missense     | DM   | PM            | 22.9       |
| MYH7    | 14         | 23894153         | c.2504A>C                        | p.K835T           | NM_000257    | 1     | missense     | DM   | PM            | 28         |
| MYH7    | 14         | 23894969         | c.2221G>C                        | p.G741R           | NM_000257    | 1     | missense     | DM   | PM            | 33         |
| MYH7    | 14         | 23895180         | c.2155C>T                        | p.R719W           | NM_000257    | 2     | missense     | DM   | PM            | 34         |
| MYH7    | 14         | 23897776         | c.1511A>G                        | p.E504G           | NM_000257    | 2     | missense     | NA   | VUS           | 27.4       |
| MYH7    | 14         | 23898213         | c.1358G>A                        | p.R453H           | NM_000257    | 1     | missense     | DM   | PM            | 35         |
| MYH7    | 14         | 23898214         | c.1357C>T                        | p.R453C           | NM_000257    | 1     | missense     | DM   | PM            | 33         |
| MYH7    | 14         | 23899110         | c.1012G>A                        | p.V338M           | NM_000257    | 1     | missense     | DM ? | VUS           | 25         |
| MYH7    | 14         | 23900677         | c.746G>A                         | p.R249Q           | NM_000257    | 1     | missense     | DM   | PM            | 28.6       |
| MYL2    | 12         | 111352091        | c.173G>A                         | p.R58Q            | NM_000432    | 1     | missense     | DM   | PM            | 29.2       |
| MYL3    | 3          | 46900970         | c.476C>T                         | p.T159M           | NM_000258    | 1     | missense     | NA   | VUS           | 28.9       |
| MYL3    | 3          | 46902192         | c.281G>A                         | p.R94H            | NM_000258    | 1     | missense     | DM   | PM            | 25.5       |
| PRKAG2  | 7          | 151573662        | c.44C>T                          | p.S15F            | NM_016203    | 1     | missense     | NA   | VUS           | 23.3       |
| RYR2    | 1          | 237862274        | c.9077C>T                        | p.A3026V          | NM_001035    | 1     | missense     | NA   | VUS           | 23.3       |
| RYR2    | 1          | 237944873        | c.11889T>G                       | p.S3963R          | NM_001035    | 1     | missense     | NA   | VUS           | 24.2       |
| SGCD    | 5          | 156186244        | c.716C>T                         | p.A239V           | NM_000337    | 1     | missense     | NA   | VUS           | 24         |
| SMAD3   | 15         | 67457668         | c.478A>G                         | p.I160V           | NM_005902    | 1     | missense     | NA   | VUS           | 16.34      |
| TGFBR2  | 3          | 30686329         | c.185A>T                         | p.D62V            | NM_003242    | 1     | missense     | NA   | VUS           | 21.1       |
| TNNI3   | 19         | 55665397         | c.544_546delAAG                  | p.182del          | NM_000363    | 2     | inframe-del  | DM   | PM            | 20.1       |
| TPM1    | 15         | 63336295         | c.184G>A                         | p.E62K            | NM_001018005 | 1     | missense     | NA   | VUS           | 29.6       |
| TTN     | 2          | 179425685        | c.85174G>A                       | p.A28392T         | NM_001267550 | 1     | missense     | NA   | VUS           | 19.75      |

|            |   |           |            |           |              |   |          |    |     |       |
|------------|---|-----------|------------|-----------|--------------|---|----------|----|-----|-------|
| <i>TTN</i> | 2 | 179431387 | c.79472C>G | p.P26491R | NM_001267550 | 1 | missense | NA | VUS | 16.07 |
| <i>TTN</i> | 2 | 179435327 | c.75532G>A | p.D25178N | NM_001267550 | 1 | missense | NA | VUS | 23.2  |
| <i>TTN</i> | 2 | 179482614 | c.47467G>T | p.D15823Y | NM_001267550 | 1 | missense | NA | VUS | 21.1  |
| <i>TTN</i> | 2 | 179571316 | c.29285C>T | p.T9762I  | NM_001267550 | 1 | missense | NA | VUS | 18.71 |

The gene symbol, chromosome, position, nucleotide change, amino acid change, RefSeq number of each variant, count, variant type, evaluation of HGMD, variant class, and CADD score are shown. DM, disease-causing mutation; HCM, hypertrophic cardiomyopathy; HGMD, Human Genome Mutation Database; NA, not applicable; PM, pathogenic mutation; VUS, variant of uncertain significance.



Supplementary Table 4. List of recurrent variants in DCM and HCM patients.

|            | <b>Gene</b>  | <b>Chromosome</b> | <b>Genomic Location</b> | <b>Nucleotide Change</b> | <b>Amino Acid Change</b> | <b>RefSeq</b> | <b>HGMD</b> | <b>Count</b> |
|------------|--------------|-------------------|-------------------------|--------------------------|--------------------------|---------------|-------------|--------------|
| <b>DCM</b> | <i>DES</i>   | 2                 | 220286086               | c.1048C>T                | p.R350W                  | NM_001927     | Known       | 2            |
|            | <i>LMNA</i>  | 1                 | 156104248               | c.568C>T                 | p.R190W                  | NM_170707     | Known       | 2            |
|            | <i>RBM20</i> | 10                | 112572055               | c.1900C>T                | p.R634W                  | NM_001134363  | Known       | 2            |
|            | <i>LMNA</i>  | 1                 | 156085053               | c.343_344delGAinsAT      | p.E115M                  | NM_170707     | Novel       | 3            |

|            | <b>Gene</b>   | <b>Chromosome</b> | <b>Genomic Location</b> | <b>Nucleotide Change</b> | <b>Amino Acid Change</b> | <b>RefSeq</b> | <b>HGMD</b> | <b>Count</b> |
|------------|---------------|-------------------|-------------------------|--------------------------|--------------------------|---------------|-------------|--------------|
| <b>HCM</b> | <i>FBN2</i>   | 5                 | 127614470               | c.7202G>A                | p.S2401N                 | NM_001999     | Novel       | 2            |
|            | <i>MYBPC3</i> | 11                | 47361201                | c.2067+1G>A              | p.Q689_splice            | NM_000256     | Known       | 2            |
|            | <i>MYH7</i>   | 14                | 23895180                | c.2155C>T                | p.R719W                  | NM_000257     | Known       | 2            |
|            | <i>MYH7</i>   | 14                | 23897776                | c.1511A>G                | p.E504G                  | NM_000257     | Novel       | 2            |
|            | <i>TNNI3</i>  | 19                | 55665397                | c.544_546delAAG          | p.182del                 | NM_000363     | Known       | 2            |
|            | <i>MYBPC3</i> | 11                | 47363554                | c.1780delT               | p.S593fs                 | NM_000256     | Known       | 3            |

The gene symbols, chromosomes, positions, nucleotide changes, amino acid changes, RefSeq numbers of recurrent variants, known or novel variant in HGMD, and counts are shown.

DCM, dilated cardiomyopathy; HCM, hypertrophic cardiomyopathy; HGMD, Human Genome Mutation Database.

Supplementary Table 5. Total number of rare variants in each patient with DCM or HCM.

|                    |       | DCM                      |                              | HCM                      |                              |
|--------------------|-------|--------------------------|------------------------------|--------------------------|------------------------------|
|                    |       | PM positive patients (%) | PM+VUS positive patients (%) | PM positive patients (%) | PM+VUS positive patients (%) |
| Number of variants | n = 0 | 83 (69.2)                | 42 (35.0)                    | 28 (53.8)                | 17 (32.7)                    |
|                    | n ≥ 1 | 37 (30.8)                | 78 (65.0)                    | 24 (46.2)                | 35 (67.3)                    |
|                    | n ≥ 2 | 1 (0.8)                  | 33 (27.5)                    | 0                        | 14 (26.9)                    |
|                    | n ≥ 3 | 0                        | 8 (6.7)                      | 0                        | 2 (3.8)                      |
|                    | n ≥ 4 | 0                        | 2 (1.7)                      | 0                        | 0                            |

The total numbers of PMs or PMs and VUSs in each patient with DCM or HCM are shown. DCM, dilated cardiomyopathy; HCM, hypertrophic cardiomyopathy; PM, pathogenic mutation; VUS, variant of uncertain significance.

Supplementary Table 6. Variant class and phenotype associations in DCM patients.

|                                                | with PM<br>(n = 37) | with VUS only<br>(n = 41) | without variant<br>(n = 42) | p value, PM vs<br>VUS | p value, PM vs<br>without variant | p value, VUS vs<br>without variant |
|------------------------------------------------|---------------------|---------------------------|-----------------------------|-----------------------|-----------------------------------|------------------------------------|
| Age at diagnosis (years)                       | 41.2 ± 11.7         | 37.0 ± 14.5               | 39.3 ± 15.2                 | 0.207                 | 0.599                             | 0.557                              |
| Male *                                         | 35 (94.6%)          | 29 (70.7%)                | 35 (83.3%)                  | 0.007                 | 0.162                             | 0.200                              |
| Familial                                       | 20 (54.1%)          | 19 (46.3%)                | 11 (26.2%)                  | 0.651                 | 0.020                             | 0.070                              |
| Familial history of sudden death               | 9 (24.3%)           | 11 (26.8%)                | 3 (7.1%)                    | 1.000                 | 0.057                             | 0.020                              |
| NYHA functional class ≥ 3 *                    | 11/35 (31.4%)       | 29/39 (74.4%)             | 25/42 (59.5%)               | <0.001                | 0.021                             | 0.238                              |
| B-type natriuretic peptide (pg/ml)             | 235 (62-600)        | 548 (164-1473)            | 335 (104-1012)              | 0.029                 | 0.128                             | 0.485                              |
| Cardiac catheterization                        | 36 (97.3%)          | 40 (97.6%)                | 41 (97.6%)                  | 1.000                 | 0.474                             | 1.000                              |
| Endomyocardial biopsy (n = 96)                 |                     |                           |                             |                       |                                   |                                    |
| Inflammation                                   | 3/29 (10.3%)        | 8/33 (24.2%)              | 6/34 (17.6%)                | 0.194                 | 0.488                             | 0.560                              |
| Fibrosis                                       | 26/29 (89.7%)       | 29/33 (87.9%)             | 31/34 (91.2%)               | 1.000                 | 1.000                             | 0.709                              |
| Echocardiography (n = 113)                     |                     |                           |                             |                       |                                   |                                    |
| LVEF (%)                                       | 28.9 ± 10.5         | 29.0 ± 12.4               | 31.6 ± 14.1                 | 0.987                 | 0.695                             | 0.554                              |
| LVEDD (mm)                                     | 63.9 ± 8.3          | 68.1 ± 12.5               | 66.3 ± 12.5                 | 0.123                 | 0.324                             | 0.506                              |
| LVESD (mm)                                     | 55.3 ± 10.6         | 60.3 ± 15.0               | 57.7 ± 15.1                 | 0.134                 | 0.423                             | 0.472                              |
| IVST (mm)                                      | 7.7 ± 2.1           | 7.3 ± 2.2                 | 8.4 ± 2.1                   | 0.406                 | 0.130                             | 0.026                              |
| PWT (mm)                                       | 8.0 ± 2.1           | 7.4 ± 2.7                 | 8.2 ± 2.4                   | 0.233                 | 0.681                             | 0.132                              |
| LV mass (g)                                    | 211.6 ± 68.5        | 216.1 ± 102.0             | 240.5 ± 90.7                | 0.710                 | 0.245                             | 0.172                              |
| LAD (mm)                                       | 44.1 ± 8.5          | 45.3 ± 10.5               | 43.9 ± 9.8                  | 0.508                 | 0.773                             | 0.387                              |
| Restrictive mitral pattern (%)                 | 6/22 (27.3%)        | 14/29 (48.3%)             | 10/23 (43.4%)               | 0.157                 | 0.353                             | 0.785                              |
| E/e'                                           | 13.2 ± 8.5          | 15.8 ± 9.0                | 14.0 ± 12.2                 | 0.352                 | 0.819                             | 0.184                              |
| Mitral regurgitation ≥ moderate                | 10/31 (32.3%)       | 18/39 (46.2%)             | 9/38 (23.7%)                | 0.327                 | 0.589                             | 0.056                              |
| Left ventricular reverse remodeling            | 11/21 (52.4%)       | 4/12 (33.3%)              | 5/12 (41.7%)                | 0.469                 | 0.721                             | 1.000                              |
| Cardiopulmonary exercise testing (n = 42)      |                     |                           |                             |                       |                                   |                                    |
| Rest exercise heart rate (beats/min)           | 76 ± 13             | 78 ± 14                   | 85 ± 18                     | 0.586                 | 0.057                             | 0.211                              |
| Peak exercise heart rate (beats/min)           | 130 ± 27            | 124 ± 33                  | 121 ± 28                    | 0.738                 | 0.492                             | 0.892                              |
| Rest exercise systolic blood pressure (mmHg)   | 98 ± 15             | 91 ± 20                   | 94 ± 19                     | 0.089                 | 0.289                             | 0.663                              |
| Peak exercise systolic blood pressure (mmHg) * | 144 ± 30            | 115 ± 26                  | 125 ± 31                    | 0.011                 | 0.151                             | 0.562                              |
| Peak VO2 (mL/kg/min)                           | 18.0 ± 6.9          | 13.2 ± 6.0                | 13.9 ± 5.9                  | 0.017                 | 0.069                             | 0.935                              |
| Follow-up data                                 |                     |                           |                             |                       |                                   |                                    |
| Amiodarone                                     | 23 (62.2%)          | 16 (39.0%)                | 18 (42.9%)                  | 0.069                 | 0.115                             | 0.824                              |
| Pacemaker implantation                         | 1 (2.7%)            | 0                         | 1 (2.4%)                    | 0.474                 | 1.000                             | 1.000                              |

|                                    |            |            |            |       |       |       |
|------------------------------------|------------|------------|------------|-------|-------|-------|
| ICD implantation                   | 4 (10.8%)  | 3 (7.3%)   | 7 (16.7%)  | 0.702 | 0.528 | 0.313 |
| CRT-D implantation †               | 17 (45.9%) | 11 (26.8%) | 8 (19.0%)  | 0.100 | 0.015 | 0.443 |
| ICD or CRT-D implantation          | 21 (56.8%) | 14 (34.1%) | 15 (35.7%) | 0.068 | 0.073 | 1.000 |
| Any device                         | 22 (59.5%) | 14 (34.1%) | 18 (42.9%) | 0.040 | 0.178 | 0.501 |
| AF                                 | 14 (37.8%) | 11 (26.8%) | 11 (26.2%) | 0.338 | 0.335 | 1.000 |
| Non-sustained VT                   | 21 (56.8%) | 21 (51.2%) | 17 (40.5%) | 0.656 | 0.179 | 0.382 |
| Sustained VT                       | 10 (27.0%) | 10 (24.4%) | 10 (23.8%) | 0.802 | 0.799 | 1.000 |
| VF, CPR                            | 4 (10.8%)  | 7 (17.1%)  | 6 (14.3%)  | 0.524 | 0.743 | 0.771 |
| Heart transplantation              | 4 (10.8%)  | 8 (19.5%)  | 10 (23.8%) | 0.356 | 0.152 | 0.791 |
| Mortality                          | 4 (10.8%)  | 3 (7.3%)   | 4 (9.5%)   | 0.702 | 1.000 | 1.000 |
| Heart transplantation or Mortality | 8 (21.6%)  | 11 (26.8%) | 14 (33.3%) | 0.610 | 0.317 | 0.634 |
| Mean follow-up duration (years)    | 8.5 ± 7.0  | 9.0 ± 9.0  | 8.6 ± 8.9  | 0.904 | 0.522 | 0.600 |

Values are n (%), the mean ± SD, or median (interquartile). Superscript letters represent significant differences compared with other groups (\* = PM group versus VUS group; † = PM group versus without variant group).

DCM, dilated cardiomyopathy; NA, not applicable; NYHA, New York Heart Association;

LV, left ventricular; EF, ejection fraction; EDD, end-diastolic diameter;

ESD, end-systolic diameter; LAD, left atrial dimension;

ICD, implantable cardioverter defibrillator; VF, ventricular fibrillation;

CRTD, cardiac resynchronization therapy defibrillator; AF, atrial fibrillation;

VT, ventricular tachycardia; CPR, cardiopulmonary ; resuscitation; NA, not applicable.

PM, pathogenic mutation; VUS, variant of uncertain significance.

Supplementary Table 7. Variant class and phenotype associations in HCM patients.

|                                              | with PM<br>(n = 24) | with VUS only<br>(n = 11) | without variant<br>(n = 17) | p value, PM vs<br>VUS | p value, PM vs<br>without variant | p value, VUS vs<br>without variant |
|----------------------------------------------|---------------------|---------------------------|-----------------------------|-----------------------|-----------------------------------|------------------------------------|
| Age at diagnosis (years)                     | 34.3 ± 17.4         | 24.1 ± 15.8               | 31.9 ± 17.1                 | 0.126                 | 0.662                             | 0.239                              |
| Male                                         | 16 (66.7%)          | 6 (54.5%)                 | 10 (58.8%)                  | 0.708                 | 0.745                             | 1.000                              |
| Familial                                     | 16 (66.7%)          | 10 (90.9%)                | 11 (64.7%)                  | 0.217                 | 1.000                             | 0.191                              |
| Familial history of sudden death             | 9 (37.5%)           | 5 (45.5%)                 | 4 (23.5%)                   | 0.721                 | 0.499                             | 0.409                              |
| NYHA functional class ≥ 3                    | 10 (41.7%)          | 6 (54.5%)                 | 4 (23.5%)                   | 0.716                 | 0.321                             | 0.125                              |
| B-type natriuretic peptide (pg/ml)           | 339 (118-759)       | 658 (97-1230)             | 240 (91-903)                | 0.513                 | 0.679                             | 0.304                              |
| Cardiac catheterization                      | 20 (83.3%)          | 9 (81.8%)                 | 16 (94.1%)                  | 1.000                 | 0.382                             | 0.543                              |
| Endomyocardial biopsy (n = 38)               |                     |                           |                             |                       |                                   |                                    |
| Inflammation                                 | 1/19 (5.3%)         | 0/7 (0%)                  | 2/12 (16.7%)                | 1.000                 | 0.544                             | 0.509                              |
| Fibrosis                                     | 19/19 (100%)        | 7/7 (100%)                | 11/12 (91.7%)               | NA                    | 0.387                             | 1.000                              |
| Echocardiography (n = 48)                    |                     |                           |                             |                       |                                   |                                    |
| LVEF (%)                                     | 47.8 ± 15.9         | 45.5 ± 19.3               | 58.7 ± 25.5                 | 0.655                 | 0.056                             | 0.196                              |
| LVEDD (mm)                                   | 53.6 ± 9.8          | 51.5 ± 13.7               | 50.8 ± 17.7                 | 0.320                 | 0.080                             | 0.440                              |
| LVESD (mm)                                   | 41.0 ± 12.3         | 38.3 ± 18.8               | 36.6 ± 23.3                 | 0.375                 | 0.080                             | 0.356                              |
| IVST (mm)                                    | 12.7 ± 4.3          | 12.1 ± 4.1                | 14 ± 4.8                    | 0.734                 | 0.318                             | 0.302                              |
| PWT (mm)                                     | 9.7 ± 3.0           | 9.3 ± 3.1                 | 9.1 ± 2.3                   | 0.551                 | 0.653                             | 0.811                              |
| LV mass (g)                                  | 235.8 ± 75.9        | 207.9 ± 86.7              | 230.0 ± 142.8               | 0.245                 | 0.209                             | 0.712                              |
| LAD (mm)                                     | 46.0 ± 10.5         | 47.8 ± 10.5               | 39.4 ± 9.6                  | 0.751                 | 0.057                             | 0.051                              |
| Restrictive mitral pattern (%)               | 7/19 (36.8%)        | 2/7 (28.6%)               | 3/15 (20.0%)                | 1.000                 | 0.451                             | 1.000                              |
| E/e'                                         | 14.3 ± 6.6          | 11.1 ± 5.3                | 14.4 ± 10.2                 | 0.314                 | 0.544                             | 0.874                              |
| Mitral regurgitation ≥ moderate              | 3/21 (14.3%)        | 1/10 (10.0%)              | 3/16 (18.8%)                | 1.000                 | 1.000                             | 1.000                              |
| Maximum wall thickness                       | 13.3 ± 4.2          | 13.0 ± 4.1                | 14.6 ± 5.3                  | 0.825                 | 0.322                             | 0.315                              |
| Peak LVOT gradient ≥ 30mmHg                  | 3/22 (13.6%)        | 0/10 (0%)                 | 2/16 (12.5%)                | 0.534                 | 1.000                             | 0.508                              |
| Cardiopulmonary exercise testing (n = 18)    |                     |                           |                             |                       |                                   |                                    |
| Rest exercise heart rate (beats/min)         | 73 ± 10             | 69 ± 9                    | 67.3 ± 6.4                  | 0.477                 | 0.550                             | 1.000                              |
| Peak exercise heart rate (beats/min)         | 103 ± 30            | 104 ± 33                  | 107 ± 32                    | 1.000                 | 1.000                             | 1.000                              |
| Rest exercise systolic blood pressure (mmHg) | 103 ± 18            | 82 ± 6                    | 81 ± 11                     | 0.040                 | 0.076                             | 1.000                              |
| Peak exercise systolic blood pressure (mmHg) | 133 ± 33            | 114 ± 22                  | 100 ± 21                    | 0.472                 | 0.073                             | 0.596                              |
| Peak VO2 (mL/kg/min)                         | 12.0 ± 2.9          | 10.6 ± 3.6                | 12.2 ± 2.6                  | 0.267                 | 1.000                             | 0.596                              |
| Follow-up data                               |                     |                           |                             |                       |                                   |                                    |
| Amiodarone                                   | 17 (70.8%)          | 5 (45.5%)                 | 6 (35.3%)                   | 0.258                 | 0.031                             | 0.701                              |
| Pacemaker implantation                       | 0                   | 0                         | 0                           | NA                    | NA                                | NA                                 |
| ICD implantation                             | 3 (12.5%)           | 4 (36.4%)                 | 3 (17.6%)                   | 0.172                 | 0.679                             | 0.381                              |

|                                    |             |             |           |       |        |        |
|------------------------------------|-------------|-------------|-----------|-------|--------|--------|
| CRT-D implantation *               | 14 (58.3%)  | 2 (18.2%)   | 1 (5.9%)  | 0.035 | <0.001 | 0.543  |
| ICD or CRT-D implantation *        | 17 (70.8%)  | 6 (54.5%)   | 4 (23.5%) | 0.451 | 0.004  | 0.125  |
| Any device *                       | 17 (70.8%)  | 6 (54.5%)   | 5 (29.4%) | 0.451 | 0.012  | 0.248  |
| AF *                               | 15 (62.5%)  | 5 (45.5%)   | 2 (11.8%) | 0.467 | 0.001  | 0.076  |
| Non-sustained VT                   | 11 (45.8%)  | 6 (54.5%)   | 3 (17.6%) | 0.725 | 0.096  | 0.095  |
| Sustained VT                       | 5 (20.8%)   | 3 (27.3%)   | 1 (5.9%)  | 0.686 | 0.373  | 0.269  |
| VF, CPR                            | 3 (12.5%)   | 3 (27.3%)   | 3 (17.6%) | 0.352 | 0.679  | 0.653  |
| End-stage HCM (LVEF < 50%)         | 18 (75.0%)  | 7 (63.6%)   | 6 (35.3%) | 0.689 | 0.023  | 0.246  |
| Heart transplantation              | 2 (8.3%)    | 1 (9.1%)    | 3 (17.6%) | 1.000 | 0.633  | 1.000  |
| Mortality                          | 1 (4.2%)    | 0           | 0         | 1.000 | 1.000  | NA     |
| Heart transplantation or Mortality | 3 (12.5%)   | 1 (9.1%)    | 3 (17.6%) | 1.000 | 0.679  | 1.000  |
| Mean follow-up duration (years) †  | 18.0 ± 12.5 | 26.6 ± 10.2 | 9.7 ± 7.5 | 0.041 | 0.028  | <0.001 |

Values are n (%), the mean ± SD, or median (interquartile). Superscript letters represent significant differences compared other groups (\* = PM group versus without variant group; † = VUS group versus without variant group.)

HCM, hypertrophic cardiomyopathy; NYHA, New York Heart Association;

LV, left ventricular; EF, ejection fraction; EDD, end-diastolic diameter;

ESD, end-systolic diameter; LAD, left atrial dimension;

LVOT, left ventricular outflow tract;

ICD, implantable cardioverter defibrillator; VF, ventricular fibrillation;

CRTD, cardiac resynchronization therapy defibrillator; AF, atrial fibrillation;

VT, ventricular tachycardia; CPR, cardiopulmonary ; resuscitation; NA, not applicable.

PM, pathogenic mutation; VUS, variant of uncertain significance.

Supplementary Table 8. Medication use in DCM patients.

|                                        | <i>TTN</i> (n = 11) | <i>LMNA</i> (n = 7) | Others (n = 27) | <i>p</i> value, <i>TTN</i> vs <i>LMNA</i> | <i>p</i> value, <i>TTN</i> vs Others | <i>p</i> value, <i>LMNA</i> vs Others |
|----------------------------------------|---------------------|---------------------|-----------------|-------------------------------------------|--------------------------------------|---------------------------------------|
| Beta-blocker                           | 11 (100%)           | 7 (100%)            | 26 (96.3%)      | NA                                        | 1.000                                | 1.000                                 |
| Carvedilol equivalent dose (mg/day)    | 17.3 ± 10.9         | 12.5 ± 7.9          | 15.5 ± 11.0     | 0.459                                     | 0.559                                | 0.763                                 |
| ACEI/ ARB                              | 11 (100%)           | 7 (100%)            | 26 (96.3%)      | NA                                        | 1.000                                | 1.000                                 |
| Mineralocorticoid receptor antagonists | 8 (72.7%)           | 5 (71.4%)           | 18 (66.7%)      | 1.000                                     | 1.000                                | 1.000                                 |
| Diuretics                              | 9 (81.8%)           | 4 (57.1%)           | 17 (63.0%)      | 0.326                                     | 0.444                                | 1.000                                 |

Values are n (%) or the mean ± SD. There were no significant differences compared with other groups.

DCM, dilated cardiomyopathy; ACEI, angiotensin converting enzyme inhibitors;

ARB, angiotensin receptor blockers; NA, not applicable.

Supplementary Table 9. Clinical features at baseline and clinical information during follow-up in DCM patients enrolled for LVRR analysis

|                                              | Total (n = 45) | LVRR present (n = 20) | LVRR absent (n = 25) | p value |
|----------------------------------------------|----------------|-----------------------|----------------------|---------|
| Age at diagnosis (years)                     | 41.6 ± 10.7    | 46.2 ± 10.3           | 38.0 ± 9.7           | 0.016   |
| Male                                         | 37 (82.2%)     | 17 (85.0%)            | 20 (80.0%)           | 0.716   |
| Familial                                     | 22 (48.9%)     | 8 (40.0%)             | 14 (56.0%)           | 0.373   |
| Familial history of sudden death             | 10 (22.2%)     | 2 (10.0%)             | 8 (32.0%)            | 0.147   |
| NYHA functional class ≥ 3                    | 19 (42.2%)     | 10 (50.0%)            | 9 (36.0%)            | 0.379   |
| B-type natriuretic peptide (pg/ml)           | 203 (44-770)   | 371 (132-978)         | 105 (20-499)         | 0.039   |
| Cardiac catheterization                      | 44 (97.8%)     | 20 (100%)             | 24 (96.0%)           | 1.000   |
| TTN truncating variant                       | 11 (24.4%)     | 9 (45.0%)             | 2 (8.0%)             | 0.006   |
| LMNA variants                                | 7 (15.6%)      | 0                     | 7 (28.0%)            | 0.012   |
| Endomyocardial biopsy (n = 36)               |                |                       |                      |         |
| Inflammation                                 | 4/36 (11.1%)   | 1/17 (5.9%)           | 3/19 (15.8%)         | 0.605   |
| Fibrosis                                     | 31/36 (86.1%)  | 15/17 (88.2%)         | 16/19 (84.2%)        | 1.000   |
| Echocardiography                             |                |                       |                      |         |
| LVEF (%)                                     | 32.2 ± 10.3    | 25.6 ± 6.5            | 37.5 ± 9.7           | <0.0001 |
| LVEDD (mm)                                   | 61.7 ± 6.1     | 64.2 ± 6.0            | 59.7 ± 5.6           | 0.029   |
| LVESD (mm)                                   | 51.9 ± 8.5     | 56.4 ± 6.9            | 48.3 ± 8.0           | <0.001  |
| IVST (mm)                                    | 8.6 ± 2.1      | 8.4 ± 1.9             | 8.8 ± 2.3            | 0.770   |
| PWT (mm)                                     | 9.0 ± 1.9      | 9.2 ± 1.7             | 9.0 ± 2.1            | 0.623   |
| LV mass (g)                                  | 228.1 ± 74.6   | 242.2 ± 78.7          | 215.9 ± 70.5         | 0.374   |
| LAD (mm)                                     | 41.9 ± 7.2     | 42.9 ± 6.9            | 41.1 ± 7.5           | 0.295   |
| Restrictive mitral pattern (%)               | 8/27 (29.6%)   | 6/13 (46.1%)          | 2/14 (14.3%)         | 0.103   |
| E/e'                                         | 10.7 ± 6.1     | 12.4 ± 7.6            | 8.9 ± 3.2            | 0.166   |
| Mitral regurgitation ≥ moderate              | 9/40 (22.5%)   | 5/19 (26.3%)          | 4/21 (19.0%)         | 0.712   |
| Cardiopulmonary exercise testing (n = 13)    |                |                       |                      |         |
| Rest exercise heart rate (beats/min)         | 73 ± 11        | 77 ± 9                | 69 ± 11              | 0.197   |
| Peak exercise heart rate (beats/min)         | 139 ± 20       | 142 ± 13              | 136 ± 28             | 1.000   |
| Rest exercise systolic blood pressure (mmHg) | 97 ± 17        | 97 ± 16               | 97 ± 20              | 0.829   |
| Peak exercise systolic blood pressure (mmHg) | 151 ± 29       | 155 ± 14              | 145 ± 41             | 0.317   |
| Peak VO <sub>2</sub> (mL/kg/min)             | 20.1 ± 7.3     | 20.8 ± 3.0            | 19.4 ± 10.7          | 0.352   |
| Follow-up data                               |                |                       |                      |         |
| Amiodarone                                   | 25 (55.6%)     | 12 (60.0%)            | 13 (52.0%)           | 0.764   |
| Pacemaker implantation                       | 0              | 0                     | 0                    | NA      |



|                                    |            |            |            |       |
|------------------------------------|------------|------------|------------|-------|
| ICD implantation                   | 8 (17.8%)  | 5 (25.0%)  | 3 (12.0%)  | 0.435 |
| CRT-D implantation                 | 8 (17.8%)  | 2 (10.0%)  | 6 (24.0%)  | 0.269 |
| ICD or CRT-D implantation          | 16 (35.6%) | 7 (35.0%)  | 9 (36.0%)  | 1.000 |
| Any device                         | 16 (35.6%) | 7 (35.0%)  | 9 (36.0%)  | 1.000 |
| AF                                 | 14 (31.1%) | 5 (25.0%)  | 9 (36.0%)  | 0.526 |
| Non-sustained VT                   | 25 (55.6%) | 13 (65.0%) | 12 (48.0%) | 0.367 |
| Sustained VT                       | 11 (24.4%) | 5 (25.0%)  | 6 (24.0%)  | 1.000 |
| VF, CPR                            | 4 (8.9%)   | 3 (15.0%)  | 1 (4.0%)   | 0.309 |
| Heart transplantation              | 3 (6.7%)   | 0          | 3 (12.0%)  | 0.242 |
| Mortality                          | 3 (6.7%)   | 0          | 3 (12.0%)  | 0.242 |
| Heart transplantation or Mortality | 6 (13.3%)  | 0          | 6 (24.0%)  | 0.027 |
| Mean duration to mid-term (years)  | 2.1 ± 0.6  | 1.9 ± 0.5  | 2.2 ± 0.6  | 0.043 |
| Mean follow-up duration (years)    | 5.2 ± 3.6  | 4.3 ± 3.0  | 6.0 ± 3.9  | 0.167 |

Values are n (%), the mean ± SD, or median (interquartile).

DCM, dilated cardiomyopathy; NYHA, New York Heart Association;

LV, left ventricular; EF, ejection fraction; EDD, end-diastolic diameter;

ESD, end-systolic diameter; LAD, left atrial dimension;

ICD, implantable cardioverter defibrillator; VF, ventricular fibrillation;

CRTD, cardiac resynchronization therapy defibrillator; AF, atrial fibrillation;

VT, ventricular tachycardia; CPR, cardiopulmonary ; resuscitation; NA, not applicable.

Supplementary Table 10. Independent predictors of LVRR.

|                                | OR    | 95% CI     | <i>p</i> value |
|--------------------------------|-------|------------|----------------|
| <i>TTN</i> truncating variants | 10.69 | 1.66-109.3 | 0.011          |
| LVEF                           | 0.86  | 0.76-0.94  | <0.001         |

OR estimation is referred to every unit increase or decrease for continuous variables.  
CI, confidence interval; LVRR, left ventricular reverse remodeling; OR, odds raio.

Supplementary Table 11. Genotype–phenotype associations in HCM patients.

|                                              | <i>MYH7</i> (n = 12) | <i>MYBPC3</i> (n = 11) | Others (n = 29) | <i>p</i> value, <i>MYH7</i> vs <i>MYBPC3</i> | <i>p</i> value, <i>MYH7</i> vs Others | <i>p</i> value, <i>MYBPC3</i> vs Others |
|----------------------------------------------|----------------------|------------------------|-----------------|----------------------------------------------|---------------------------------------|-----------------------------------------|
| Age at diagnosis (years)                     | 25.4 ± 17.6          | 39.0 ± 12.6            | 30.9 ± 17.8     | 0.049                                        | 0.344                                 | 0.150                                   |
| Male*                                        | 3 (25.0%)            | 10 (90.9%)             | 19 (65.5%)      | 0.003                                        | 0.037                                 | 0.233                                   |
| Familial                                     | 9 (75.0%)            | 7 (63.6%)              | 21 (72.4%)      | 0.667                                        | 1.000                                 | 0.704                                   |
| Familial history of sudden death             | 5 (41.7%)            | 2 (18.2%)              | 11 (37.9%)      | 0.371                                        | 1.000                                 | 0.286                                   |
| NYHA functional class ≥ 3                    | 7 (58.3%)            | 5 (45.5%)              | 8 (27.6%)       | 0.684                                        | 0.083                                 | 0.451                                   |
| B-type natriuretic peptide (pg/ml)           | 419 (129-685)        | 362 (110-865)          | 282 (109-943)   | 0.820                                        | 0.723                                 | 0.942                                   |
| Cardiac catheterization                      | 11 (91.7%)           | 8 (72.7%)              | 26 (89.7%)      | 0.317                                        | 1.000                                 | 0.319                                   |
| Endomyocardial biopsy (n = 38)               |                      |                        |                 |                                              |                                       |                                         |
| Inflammation                                 | 1/10 (10.0%)         | 0/8 (0%)               | 2/20 (10.0%)    | 1.000                                        | 1.000                                 | 1.000                                   |
| Fibrosis                                     | 10/10 (100%)         | 8/8 (100%)             | 19/20 (95.0%)   | NA                                           | 1.000                                 | 1.000                                   |
| Echocardiography (n = 48)                    |                      |                        |                 |                                              |                                       |                                         |
| LVEF (%)                                     | 48.8 ± 18.1          | 44.3 ± 16.0            | 54.1 ± 22.8     | 0.500                                        | 0.493                                 | 0.201                                   |
| LVEDD (mm)                                   | 51.8 ± 11.9          | 52.7 ± 9.0             | 52.2 ± 15.6     | 0.879                                        | 0.711                                 | 0.380                                   |
| LVESD (mm)                                   | 39.9 ± 15.6          | 40.0 ± 11.2            | 38.1 ± 20.6     | 1.000                                        | 0.479                                 | 0.257                                   |
| IVST (mm)                                    | 11.1 ± 3.5           | 13.8 ± 4.6             | 13.5 ± 4.6      | 0.252                                        | 0.103                                 | 0.956                                   |
| PWT (mm)                                     | 8.5 ± 2.2            | 10.1 ± 2.8             | 9.5 ± 3.0       | 0.249                                        | 0.464                                 | 0.462                                   |
| LV mass (g)                                  | 186.6 ± 65.0         | 252.2 ± 74.1           | 236.6 ± 121.2   | 0.058                                        | 0.157                                 | 0.306                                   |
| LAD (mm)                                     | 43.8 ± 10.5          | 47.6 ± 8.7             | 43.1 ± 11.3     | 0.322                                        | 0.809                                 | 0.148                                   |
| Restrictive mitral pattern (%)               | 3/8 (37.5%)          | 2/7 (28.6%)            | 7/26 (26.9%)    | 1.000                                        | 0.666                                 | 1.000                                   |
| E/e'                                         | 12.3 ± 5.9           | 15.0 ± 7.7             | 13.7 ± 8.7      | 0.609                                        | 0.638                                 | 0.561                                   |
| Mitral regurgitation ≥ moderate              | 0/11 (0%)            | 2/9 (22.2%)            | 5/27 (18.5%)    | 0.190                                        | 0.295                                 | 1.000                                   |
| Maximum wall thickness                       | 11.6 ± 3.6           | 14.6 ± 4.0             | 14.3 ± 4.9      | 0.169                                        | 0.069                                 | 1.000                                   |
| Peak LVOT gradient ≥ 30mmHg                  | 2/12 (16.7%)         | 0/9 (0%)               | 3/27 (11.1%)    | 0.486                                        | 0.634                                 | 0.558                                   |
| Cardiopulmonary exercise testing (n = 18)    |                      |                        |                 |                                              |                                       |                                         |
| Rest exercise heart rate (beats/min)         | 75 ± 5               | 68 ± 8                 | 71 ± 11         | 0.298                                        | 0.411                                 | 0.745                                   |
| Peak exercise heart rate (beats/min)         | 112 ± 24             | 94 ± 31                | 110 ± 30        | 0.255                                        | 0.919                                 | 0.385                                   |
| Rest exercise systolic blood pressure (mmHg) | 105 ± 13             | 102 ± 23               | 84 ± 10         | 0.699                                        | 0.053                                 | 0.107                                   |
| Peak exercise systolic blood pressure (mmHg) | 110 ± 14             | 144 ± 37               | 110 ± 20        | 0.255                                        | 1.000                                 | 0.064                                   |
| Peak VO <sub>2</sub> (mL/kg/min)             | 11.0 ± 4.1           | 12.4 ± 2.7             | 11.5 ± 2.9      | 1.000                                        | 0.919                                 | 0.452                                   |
| Follow-up data                               |                      |                        |                 |                                              |                                       |                                         |
| Amiodarone                                   | 6 (50.0%)            | 7 (63.6%)              | 15 (51.7%)      | 0.680                                        | 1.000                                 | 0.724                                   |
| Pacemaker implantation                       | 0                    | 0                      | 0               | NA                                           | NA                                    | NA                                      |
| ICD implantation                             | 2 (16.7%)            | 2 (18.2%)              | 6 (20.7%)       | 1.000                                        | 1.000                                 | 1.000                                   |
| CRT-D implantation                           | 6 (50.0%)            | 6 (54.5%)              | 5 (17.2%)       | 1.000                                        | 0.052                                 | 0.042                                   |
| ICD or CRT-D implantation                    | 8 (66.7%)            | 8 (72.7%)              | 11 (37.9%)      | 1.000                                        | 0.168                                 | 0.078                                   |

|                                    |             |             |             |       |       |       |
|------------------------------------|-------------|-------------|-------------|-------|-------|-------|
| Any device                         | 8 (66.7%)   | 8 (72.7%)   | 12 (41.4%)  | 1.000 | 0.181 | 0.155 |
| AF                                 | 5 (41.7%)   | 8 (72.7%)   | 9 (31.0%)   | 0.214 | 0.719 | 0.031 |
| Non-sustained VT                   | 3 (25.0%)   | 6 (54.5%)   | 11 (37.9%)  | 0.214 | 0.494 | 0.477 |
| Sustained VT                       | 2 (16.7%)   | 4 (36.4%)   | 3 (10.3%)   | 0.371 | 0.620 | 0.076 |
| VF, CPR                            | 3 (25.0%)   | 2 (18.2%)   | 4 (13.8%)   | 1.000 | 0.398 | 1.000 |
| End-stage HCM (LVEF < 50%)         | 8 (66.7%)   | 8 (72.7%)   | 15 (51.7%)  | 1.000 | 0.497 | 0.297 |
| Heart transplantation              | 1 (8.3%)    | 1 (9.1%)    | 4 (13.8%)   | 1.000 | 1.000 | 1.000 |
| Mortality                          | 1 (8.3%)    | 0           | 0           | 1.000 | 0.293 | NA    |
| Heart transplantation or Mortality | 2 (16.7%)   | 1 (9.1%)    | 4 (13.8%)   | 1.000 | 1.000 | 1.000 |
| Mean follow-up duration (years)    | 20.1 ± 11.3 | 15.8 ± 11.2 | 16.4 ± 12.9 | 0.355 | 0.315 | 0.952 |

Values are n (%), the mean ± SD, or median (interquartile). Superscript letters represent significant differences compared with other groups

(\* = *MYH7* group versus *MYBPC3* group).

HCM, hypertrophic cardiomyopathy; NYHA, New York Heart Association;

LV, left ventricular; EF, ejection fraction; EDD, end-diastolic diameter;

ESD, end-systolic diameter; LAD, left atrial dimension;

LVOT, left ventricular outflow tract;

ICD, implantable cardioverter defibrillator; VF, ventricular fibrillation;

CRTD, cardiac resynchronization therapy defibrillator; AF, atrial fibrillation;

VT, ventricular tachycardia; CPR, cardiopulmonary ; resuscitation; NA, not applicable.

# Supplementary Figure 1.

a

|                              | Gene symbol   | DCM    | Patient (%) |
|------------------------------|---------------|--------|-------------|
| Cardiomyopathy related gene  | <i>TTN</i>    |        | 40 (33%)    |
|                              | <i>LMNA</i>   |        | 13 (11%)    |
|                              | <i>RBM20</i>  |        | 5 (4%)      |
|                              | <i>DES</i>    |        | 4 (3%)      |
|                              | <i>DSP</i>    |        | 4 (3%)      |
|                              | <i>RYR2</i>   |        | 4 (3%)      |
|                              | <i>SCN5A</i>  |        | 3 (3%)      |
|                              | <i>BAG3</i>   |        | 2 (2%)      |
|                              | <i>DMD</i>    |        | 2 (2%)      |
|                              | <i>TNNT2</i>  |        | 2 (2%)      |
|                              | <i>MYOM1</i>  |        | 2 (2%)      |
|                              | <i>ACTN2</i>  |        | 1 (1%)      |
|                              | <i>EMD</i>    |        | 1 (1%)      |
|                              | <i>JPH2</i>   |        | 1 (1%)      |
|                              | <i>JUP</i>    |        | 1 (1%)      |
|                              | <i>MYBPC3</i> |        | 1 (1%)      |
|                              | <i>MYH6</i>   |        | 1 (1%)      |
|                              | <i>MYPN</i>   |        | 1 (1%)      |
|                              | <i>MYOZ2</i>  |        | 1 (1%)      |
|                              | <i>NEBL</i>   |        | 1 (1%)      |
|                              | <i>NEXN</i>   |        | 1 (1%)      |
|                              | <i>PKP2</i>   |        | 1 (1%)      |
|                              | <i>SOS1</i>   |        | 1 (1%)      |
| <i>TNNC1</i>                 |               | 1 (1%) |             |
| Arrhythmia related gene      | <i>AKAP9</i>  |        | 1 (1%)      |
|                              | <i>ANK2</i>   |        | 1 (1%)      |
|                              | <i>CACNB2</i> |        | 1 (1%)      |
|                              | <i>KCNQ1</i>  |        | 1 (1%)      |
| Noonan syndrome related gene | <i>NF1</i>    |        | 2 (2%)      |
|                              | <i>MAP2K2</i> |        | 1 (1%)      |
| Marfan syndrome related gene | <i>FBN2</i>   |        | 3 (3%)      |
|                              | <i>MYH11</i>  |        | 2 (2%)      |
|                              | <i>CBS</i>    |        | 1 (1%)      |
|                              | <i>FBN1</i>   |        | 1 (1%)      |
|                              | <i>SMAD3</i>  |        | 1 (1%)      |

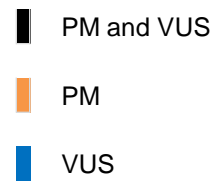

# Supplementary Figure 1.

b

|                              | Gene symbol             | HCM   | Patient (%) |
|------------------------------|-------------------------|-------|-------------|
| Cardiomyopathy related gene  | MYH7                    |       | 12 (23%)    |
|                              | MYBPC3                  |       | 11 (21%)    |
|                              | TTN                     |       | 5 (10%)     |
|                              | DSP                     |       | 2 (4%)      |
|                              | LMNA                    |       | 2 (4%)      |
|                              | MYL3                    |       | 2 (4%)      |
|                              | RYR2                    |       | 2 (4%)      |
|                              | TNNI3                   |       | 2 (4%)      |
|                              | ACTN2                   |       | 1 (2%)      |
|                              | DMD                     |       | 1 (2%)      |
|                              | MYL2                    |       | 1 (2%)      |
|                              | TPM1                    |       | 1 (2%)      |
|                              | SGCD                    |       | 1 (2%)      |
|                              | Arrhythmia related gene | KCNQ1 |             |
| CACNA1C                      |                         |       | 1 (2%)      |
| Noonan syndrome related gene | PRKAG2                  |       | 1 (2%)      |
| Marfan syndrome related gene | FBN2                    |       | 2 (4%)      |
|                              | MYH11                   |       | 1 (2%)      |
|                              | SMAD3                   |       | 1 (2%)      |
|                              | TGFBR2                  |       | 1 (2%)      |

PM

VUS

Supplementary Figure 2.

**a**

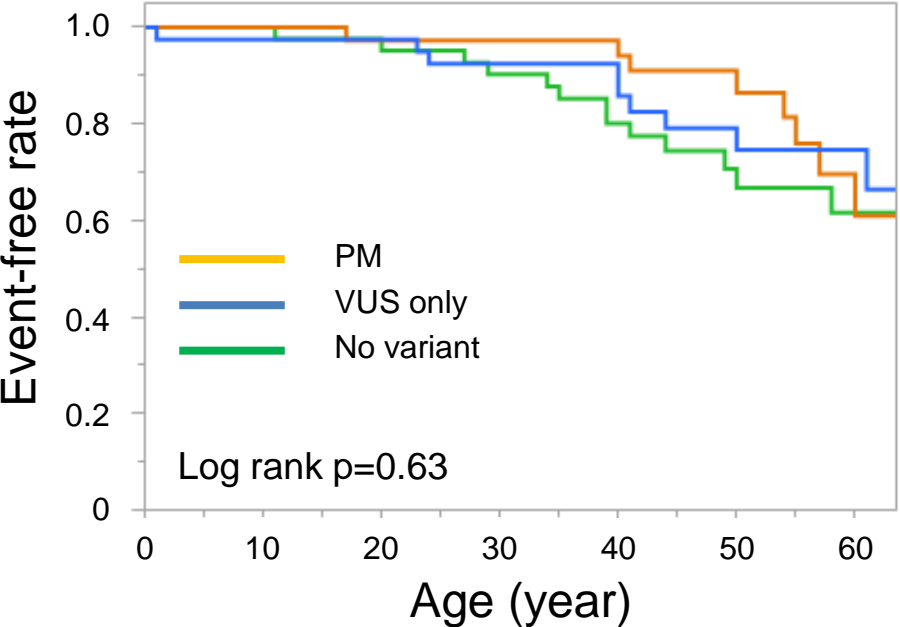

**b**

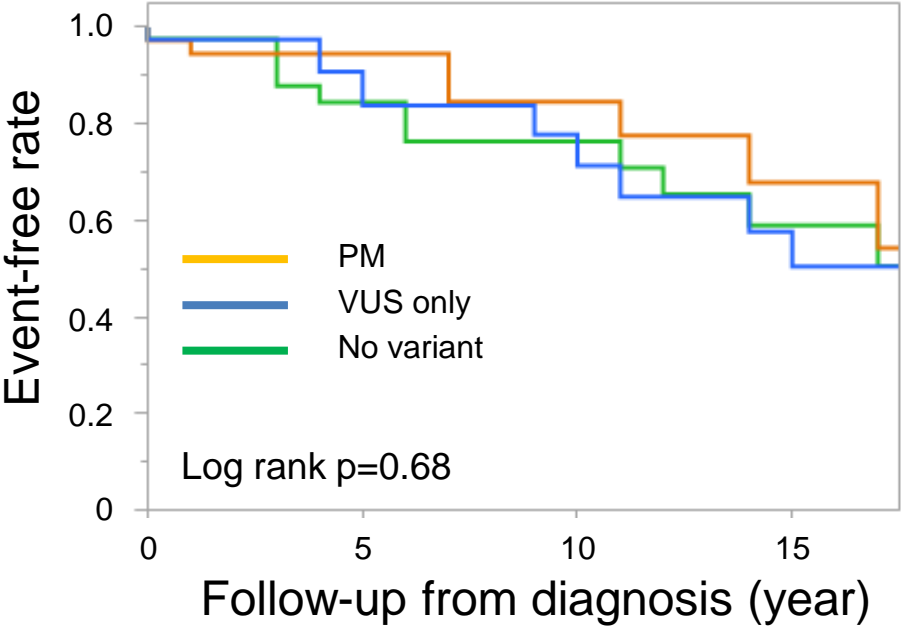

Supplementary Figure 3.

**a**

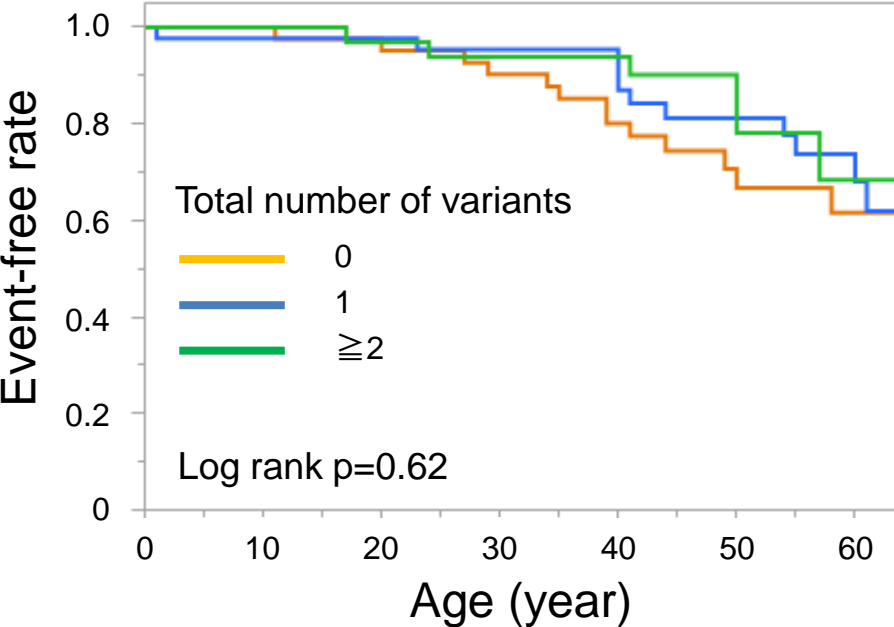

**b**

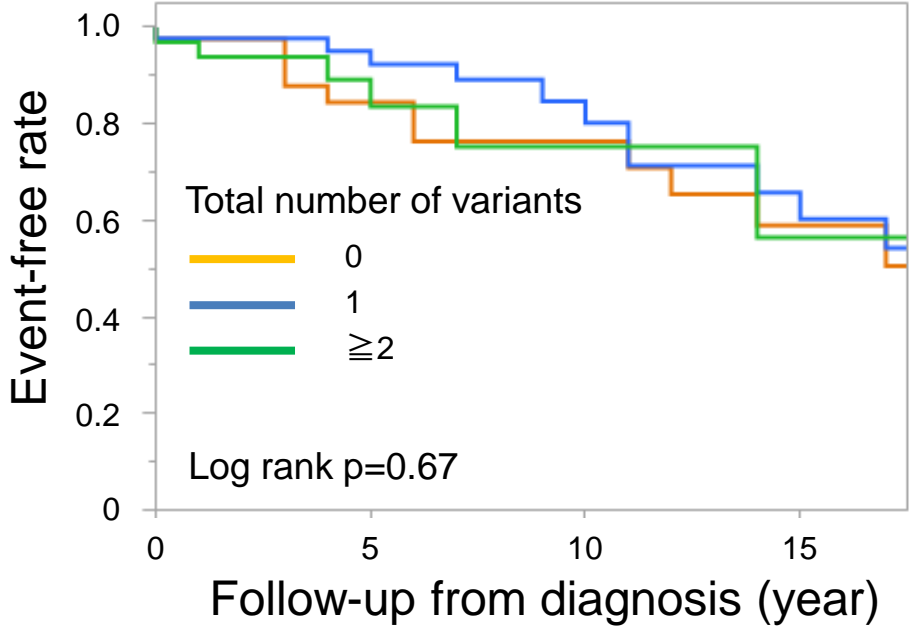



## **Supplementary Figure Legends**

Supplementary Figure 1. Detailed genetic profiles of cardiomyopathies.

Detailed genetic profiles of DCM (a) and HCM (b) are represented. Genes closely linked to cardiomyopathy (yellow), arrhythmias (light green), Noonan syndrome (pink), and Marfan syndrome (light blue) are shown. Colored cells represent the presence of PM (orange), VUS (blue), or PM and VUS (black).

DCM, dilated cardiomyopathy; HCM, hypertrophic cardiomyopathy; PM, pathogenic mutation; VUS, variant of uncertain significance.

Supplementary Figure 2. Associations between clinical outcomes and variant class.

Kaplan–Meier curves illustrating heart transplant- or death-free survival of the patients with PM (n = 37), VUS only (n = 41), and no variants (n = 42) throughout lifespan (a) and during follow-up (b). Probability values were calculated by log-rank tests.

PM, pathogenic mutation; VUS, variant of uncertain significance.

Supplementary Figure 3. Associations between clinical outcomes and total number of variants.

Kaplan–Meier curves illustrating heart transplant- or death-free survival of the patients with no variants (n = 42), one variant (n = 45), and more than one variants (n = 33) throughout lifespan (a) and during follow-up (b). Probability values were calculated by log-rank tests.
